# Supplementary material for: Fluid status telemedicine alerts for heart failure: a randomized controlled trial
Source: Oxford University Press journal article supplement (doi:10.1093/eurheartj/ehw099), 2016-03-16
Supplement: ehw099_Supp.zip [file ehw099_Supp.zip]

Archive with 2 entries (2 files):
- ehw099supp.pdf
- ehw099supp_figs.doc
